# Supplementary material for: The Gender Impact Assessment among Healthcare Workers in the SARS-CoV-2 Vaccination—An Analysis of Serological Response and Side Effects
Source: MDPI journal article supplement (doi:10.3390/vaccines9050522), 2021-05-18
Supplement: s1 [file s1]

**Table S1: The distribution in terms of sex (64% females; 36% males) and age of the all the healthcare workers (HW) at IRCCS San Raffaele Hospital.**

|                        | age group (y) | n           |
|------------------------|---------------|-------------|
| Females                | <48           | 2473        |
|                        | 48-52         | 584         |
|                        | >52           | 1049        |
| <b>Total</b>           |               | <b>4106</b> |
| Males                  | <40           | 1002        |
|                        | 40-60         | 1015        |
|                        | >60           | 272         |
| <b>Total</b>           |               | <b>2289</b> |
| <b>Total HW in OSR</b> |               | <b>6395</b> |

**Table S2: Serological tests in the population with the natural immunity to SARS-CoV-2.** Median values and IQR (Q1 and Q3) are reported, disaggregated by sex (M: male; F: female) and age groups.

| Age group | M  |        |     | F  |        |     | Age group |
|-----------|----|--------|-----|----|--------|-----|-----------|
|           | Q1 | Median | Q3  | Q1 | Median | Q3  |           |
| <40 y     | 7  | 27     | 65  | 8  | 27     | 69  | <48 y     |
| 41-60 y   | 10 | 38     | 83  | 15 | 42     | 124 | 48-52 y   |
| >60 y     | 24 | 59     | 105 | 10 | 43     | 130 | >52 y     |

**Table S3: Serological values at T1 of the reactive subjects to the first vaccine dose.** Median values and IQR (Q1 and Q3) are reported. In males, the statistically significant difference is present between <40 y and 40-60y, between 40-60y and >60y, and between <40y and >60y ( $p<0.0001$ ). In females, among the different groups the following p values are reported: <48y vs >52y,  $p<0.0001$ ; <48y vs 48-52y,  $p=0.002$ ; 48-52y vs >52y,  $p=0.002$ .

| Age group | M  |        |    | F  |        |    | Age group |
|-----------|----|--------|----|----|--------|----|-----------|
|           | Q1 | Median | Q3 | Q1 | Median | Q3 |           |

|         |      |      |      |      |      |       |         |
|---------|------|------|------|------|------|-------|---------|
| <40 y   | 27,1 | 62,9 | 145  | 24.4 | 54.1 | 129,5 | <48 y   |
| 41-60 y | 10,3 | 29,6 | 84,9 | 19   | 45   | 90    | 48-52 y |
| >60 y   | 4,5  | 12,1 | 35,7 | 9    | 29   | 81    | >52 y   |

**Table S4: Serological values at T2 to evaluate the response to the COVID-19 vaccine.**  
Median values and IQR (Q1 and Q3) are reported, disaggregated by sex and age groups.

| Age group | M      |        |        | F      |        |      | Age group |
|-----------|--------|--------|--------|--------|--------|------|-----------|
|           | Q1     | Median | Q3     | Q1     | Median | Q3   |           |
| <40 y     | 1185,5 | 1844   | 2500   | 1179,2 | 2054,5 | 2500 | <48 y     |
| 41-60 y   | 693,2  | 1495   | 2264,5 | 1053,5 | 1609   | 2500 | 48-52 y   |
| >60 y     | 623,2  | 1235,5 | 1850   | 700    | 1521   | 2500 | >52 y     |

**Table S5: Percentage of respondents based on disaggregated data by sex and age groups.**

|                    | age group (y) | %   |
|--------------------|---------------|-----|
| Respondent females | <48           | 61  |
|                    | 48-52         | 15  |
|                    | >52           | 24  |
| Respondent males   | <40           | 44% |
|                    | 40-60         | 43% |
|                    | > 60          | 13% |
